# Supplementary material for: Evolution of relative brain size in dogs—no effects of selection for breed function, litter size, or longevity
Source: Oxford University Press journal article supplement (doi:10.1093/evolut/qpad063), 2023-04-18
Supplement: qpad063_suppl_supplementary_material.pdf [file qpad063_suppl_supplementary_material.pdf]

## SUPPLEMENTARY MATERIAL

**Table S1.** The list of IDs of the dog skulls that were used in the CT scan analyses to create endocasts and compute brain volume (these specimens are housed at the Eötvös Loránd University). Lines are sorted alphabetically by abbreviation name (breed names are given in Table S2).

| Abbreviation | Specimen ID | Abbreviation | Specimen ID | Abbreviation | Specimen ID |
|--------------|-------------|--------------|-------------|--------------|-------------|
| AFFP         | ELTE-82-A   | BICH         | ELTE-22-A   | BSJI         | ELTE-14-B   |
| AFGH         | ELTE-2-A2   | BICH         | ELTE-22-B   | BUC          | ELTE-34-B   |
| AFGH         | ELTE-2-A    | BICH         | ELTE-22-    | BULD         | ELTE-6-C    |
| AFGH         | ELTE-2-B    | BMD          | ELTE-21-C2  | BULD         | ELTE-6-C2   |
| AIRT         | ELTE-1-B    | BMD          | ELTE-21-C   | BULM         | ELTE-35-C   |
| AIRT         | ELTE-1-A2   | BMD          | ELTE-21-    | BULM         | ELTE-35-A   |
| AIRT         | ELTE-1-B2   | BMD          | ELTE-21-A   | BULM         | ELTE-35-C2  |
| AIRT         | ELTE-1-A    | BOL          | ELTE-24-A   | BULT         | ELTE-36-C   |
| AKIT         | ELTE-3-B    | BOL          | ELTE-24-C   | BULT         | ELTE-36-A   |
| AKIT         | ELTE-3-A    | BORD         | ELTE-26-C   | CAIR         | ELTE-153-   |
| AMAL         | ELTE-85-A   | BORD         | ELTE-26-B   | CANE         | ELTE-39-C2  |
| AMAL         | ELTE-85-B   | BORD         | ELTE-26-A   | CANE         | ELTE-39-A   |
| AMB          | ELTE-4-A    | BORT         | ELTE-27-C   | CANE         | ELTE-39-B   |
| AMB          | ELTE-4-C    | BORZ         | ELTE-97-B   | CANE         | ELTE-39-C   |
| AMB          | ELTE-4-A2   | BORZ         | ELTE-97-    | CANE         | ELTE-39-    |
| APBT         | ELTE-106-C  | BORZ         | ELTE-97-C   | CARD         | ELTE-141-   |
| APBT         | ELTE-106-   | BORZ         | ELTE-97-A   | CARD         | ELTE-141-   |
| APBT         | ELTE-106-   | BOST         | ELTE-28-B2  | CASD         | ELTE-75-    |
| APBT         | ELTE-106-B  | BOST         | ELTE-28-B   | CASD         | ELTE-75-B   |
| APBT         | ELTE-106-   | BOX          | ELTE-30-B   | CASD         | ELTE-75-B2  |
| AUSS         | ELTE-12-A   | BOX          | ELTE-30-B2  | CASD         | ELTE-75-C   |
| AUST         | ELTE-13-A   | BOX          | ELTE-30-    | CASD         | ELTE-75-A   |
| AUST         | ELTE-13-C   | BOX          | ELTE-30-    | CASD         | ELTE-75-C2  |
| BAND         | ELTE-155-   | BOX          | ELTE-30-C3  | CED          | ELTE-67-C   |
| BAND         | ELTE-155-C  | BOX          | ELTE-30-    | CHIH         | ELTE-45-C   |
| BASS         | ELTE-29-A   | BOX          | ELTE-30-C2  | CHIH         | ELTE-45-C2  |
| BASS         | ELTE-29-B   | BOX          | ELTE-30-C   | CHIH         | ELTE-45-A   |
| BASS         | ELTE-29-    | BOX          | ELTE-30-A   | CHIH         | ELTE-45-    |
| BEAG         | ELTE-15-C   | BRFG         | ELTE-54-B   | CHIH         | ELTE-45-C3  |
| BEAG         | ELTE-15-C2  | BRIA         | ELTE-32-B   | CHIN         | ELTE-65-C   |
| BEAG         | ELTE-15-C3  | BRIA         | ELTE-32-C   | CHIN         | ELTE-65-B   |
| BEAU         | ELTE-17-C   | BRIA         | ELTE-32-B2  | CHIN         | ELTE-65-A   |
| BEDT         | ELTE-151-   | BRIT         | ELTE-31-C   | CHOW         | ELTE-43-A   |
| BELS         | ELTE-19-C   | BRTR         | ELTE-98-C   | CHOW         | ELTE-43-C   |
| BELS         | ELTE-19-A   | BRTR         | ELTE-98-B   | CHOW         | ELTE-43-C2  |
| BICH         | ELTE-22-B2  | BRTR         | ELTE-98-C2  | CHOW         | ELTE-43-C3  |
| BICH         | ELTE-22-C   | BRUS         | ELTE-33-A   | CHOW         | ELTE-43-B   |

| Abbreviation | Specimen ID | Abbreviation | Specimen ID | Abbreviation | Specimen ID |
|--------------|-------------|--------------|-------------|--------------|-------------|
| CHW          | ELTE-44-B   | ESET         | ELTE-10-C2  | HUGR         | ELTE-83-A   |
| CKCS         | ELTE-40-C   | ESET         | ELTE-10-B2  | HUGR         | ELTE-83-    |
| CKCS         | ELTE-40-B   | ESET         | ELTE-10-C   | HUGR         | ELTE-83-B   |
| CMAS         | ELTE-68-B   | ESET         | ELTE-10-B   | HUGR         | ELTE-83-    |
| CMAS         | ELTE-68-B2  | ESET         | ELTE-10-A   | HUGR         | ELTE-83-    |
| COLL         | ELTE-122-   | ESET         | ELTE-10-C3  | HUGR         | ELTE-83-C   |
| COLL         | ELTE-122-   | ESSP         | ELTE-8-A    | HUGR         | ELTE-83-B2  |
| COLL         | ELTE-122-C  | FBUL         | ELTE-53-A   | HUSK         | ELTE-61-A   |
| COTO         | ELTE-42-B   | FBUL         | ELTE-53-C   | HUSK         | ELTE-61-B   |
| CRES         | ELTE-72-    | FBUL         | ELTE-53-C2  | HUSK         | ELTE-61-C3  |
| CRES         | ELTE-72-B   | FIBR         | ELTE-50-B   | HUSK         | ELTE-61-C2  |
| CRES         | ELTE-72-C2  | FIBR         | ELTE-50-A   | HUSK         | ELTE-61-C   |
| CRES         | ELTE-72-B2  | GABN         | ELTE-9-A    | INCA         | ELTE-101-   |
| CRES         | ELTE-72-A   | GESP         | ELTE-150-B  | ISET         | ELTE-63-A   |
| CRES         | ELTE-72-C   | GGG          | ELTE-126-C  | ISET         | ELTE-63-C2  |
| CSD          | ELTE-69-C   | GGG          | ELTE-126-   | ISET         | ELTE-63-C   |
| CSD          | ELTE-69-C2  | GOLD         | ELTE-56-C   | ISET         | ELTE-63-B   |
| CSD          | ELTE-69-C3  | GOLD         | ELTE-56-C2  | ITGY         | ELTE-96-A   |
| DACH         | ELTE-132-B  | GORD         | ELTE-57-C   | ITGY         | ELTE-96-    |
| DACH         | ELTE-132-C  | GPYR         | ELTE-104-   | ITGY         | ELTE-96-B   |
| DACH         | ELTE-132-   | GPYR         | ELTE-104-C  | IWOF         | ELTE-62-B   |
| DACH         | ELTE-131-   | GPYR         | ELTE-104-   | IWOF         | ELTE-62-A   |
| DACH         | ELTE-132-   | GPYR         | ELTE-104-   | JACK         | ELTE-64-C2  |
| DACH         | ELTE-132-   | GPYR         | ELTE-104-   | JACK         | ELTE-64-C3  |
| DALM         | ELTE-46-C2  | GPYR         | ELTE-104-   | JACK         | ELTE-64-C   |
| DALM         | ELTE-46-C   | GREE         | ELTE-58-A   | KCS          | ELTE-73-C2  |
| DANE         | ELTE-91-C   | GREY         | ELTE-5-A    | KCS          | ELTE-73-C3  |
| DANE         | ELTE-91-B   | GREY         | ELTE-5-B2   | KCS          | ELTE-73-C   |
| DANE         | ELTE-91-A   | GREY         | ELTE-5-B3   | KEES         | ELTE-70-A   |
| DDBX         | ELTE-25-C   | GREY         | ELTE-5-B    | KERY         | ELTE-71-C   |
| DDBX         | ELTE-25-C2  | GREY         | ELTE-5-A2   | KERY         | ELTE-71-B   |
| DDBX         | ELTE-25-C3  | GSD          | ELTE-92-C3  | KOMO         | ELTE-74-A   |
| DEER         | ELTE-121-C  | GSD          | ELTE-93-A   | KOMO         | ELTE-74-C   |
| DEER         | ELTE-121-   | GSD          | ELTE-93-C   | KOMO         | ELTE-74-    |
| DGA          | ELTE-11-C   | GSD          | ELTE-92-C2  | KUVZ         | ELTE-76-A   |
| DGA          | ELTE-11-C2  | GSD          | ELTE-92-C   | KUVZ         | ELTE-76-C   |
| DOBP         | ELTE-47-A   | GSD          | ELTE-92-B   | KUVZ         | ELTE-76-C2  |
| DOBP         | ELTE-47-C   | GSMD         | ELTE-154-B  | LAB          | ELTE-77-    |
| DOBP         | ELTE-47-C2  | GSNZ         | ELTE-114-B  | LAB          | ELTE-77-C   |
| DOBP         | ELTE-47-C3  | GSNZ         | ELTE-114-C  | LAB          | ELTE-77-A   |
| DUNK         | ELTE-48-A   | GSNZ         | ELTE-114-   | LEON         | ELTE-80-A   |
| ECKR         | ELTE-41-B   | GSPA         | ELTE-55-A   | LEON         | ELTE-80-B   |
| ECKR         | ELTE-41-C2  | GWHP         | ELTE-95-C2  | LEON         | ELTE-80-B2  |
| ECKR         | ELTE-41-C3  | GWHP         | ELTE-95-C3  | LEON         | ELTE-80-    |
| ECKR         | ELTE-41-C   | GWHP         | ELTE-95-C   | LEON         | ELTE-80-    |
| ECKR         | ELTE-41-A   | HANO         | ELTE-148-C  | LEON         | ELTE-80-C   |
| ECKR         | ELTE-41-B2  | HAVA         | ELTE-59-A   | LHSA         | ELTE-81-A   |
| ENPO         | ELTE-107-C  | HOV          | ELTE-60-B   | LMUN         | ELTE-102-   |
| ENPO         | ELTE-107-   | HOV          | ELTE-60-A   | LNDS         | ELTE-78-A   |

| Abbreviation | Specimen ID | Abbreviation | Specimen ID | Abbreviation | Specimen ID |
|--------------|-------------|--------------|-------------|--------------|-------------|
| LNDS         | ELTE-78-C   | PEKE         | ELTE-100-C  | STAF         | ELTE-127-   |
| MALT         | ELTE-86-A   | PEKE         | ELTE-100-   | STAF         | ELTE-127-C  |
| MAST         | ELTE-7-A2   | PEKE         | ELTE-100-   | STAF         | ELTE-127-   |
| MAST         | ELTE-7-A3   | PEMB         | ELTE-142-C  | STBD         | ELTE-20-A   |
| MAST         | ELTE-7-A    | PEMB         | ELTE-142-B  | STBD         | ELTE-20-C   |
| MAST         | ELTE-7-C2   | POLH         | ELTE-79-C   | STBD         | ELTE-20-C4  |
| MAST         | ELTE-7-C3   | POM          | ELTE-108-   | STBD         | ELTE-20-C2  |
| MAST         | ELTE-7-C    | POM          | ELTE-108-   | STBD         | ELTE-20-C3  |
| MAST         | ELTE-7-B    | POM          | ELTE-108-C  | TIBM         | ELTE-133-   |
| MBLT         | ELTE-152-   | POSH         | ELTE-109-C  | TIBT         | ELTE-134-B  |
| MBLT         | ELTE-152-C  | PUG          | ELTE-87-C   | TOSA         | ELTE-135-   |
| MDGS         | ELTE-125-   | PUG          | ELTE-87-C2  | TOSA         | ELTE-135-B  |
| MDGS         | ELTE-125-C  | PULI         | ELTE-110-   | TOSA         | ELTE-135-   |
| MDPO         | ELTE-138-C  | PULI         | ELTE-110-   | TOSA         | ELTE-135-C  |
| MDPO         | ELTE-138-   | PULI         | ELTE-110-C  | TRHO         | ELTE-49-C   |
| MDPO         | ELTE-138-   | PUMI         | ELTE-111-   | TURV         | ELTE-18-C2  |
| MDPO         | ELTE-138-   | PUMI         | ELTE-111-C  | TURV         | ELTE-18-C   |
| MDPO         | ELTE-138-   | PYRM         | ELTE-105-   | VIZS         | ELTE-84-A   |
| MDPO         | ELTE-138-   | RHOD         | ELTE-112-   | VIZS         | ELTE-84-B   |
| MDPO         | ELTE-138-B  | RHOD         | ELTE-112-B  | VIZS         | ELTE-84-C   |
| MNGS         | ELTE-124-   | RHOD         | ELTE-112-   | WEIM         | ELTE-140-B  |
| MNGS         | ELTE-124-C  | RHOD         | ELTE-112-C  | WEIM         | ELTE-140-C  |
| MNGS         | ELTE-124-B  | ROTT         | ELTE-113-   | WEIM         | ELTE-140-   |
| MNGS         | ELTE-124-   | ROTT         | ELTE-113-   | WELT         | ELTE-143-B  |
| MNGS         | ELTE-124-   | SALU         | ELTE-94-A   | WFOX         | ELTE-51-B   |
| MNGS         | ELTE-124-   | SAMO         | ELTE-128-   | WFOX         | ELTE-51-C   |
| MNGS         | ELTE-124-   | SCHA         | ELTE-117-   | WFOX         | ELTE-51-C2  |
| MOWA         | ELTE-88-C   | SCOT         | ELTE-123-   | WHIP         | ELTE-145-   |
| MOWA         | ELTE-88-C2  | SCOT         | ELTE-123-   | WHIP         | ELTE-145-   |
| MOWA         | ELTE-88-A   | SCOT         | ELTE-123-   | WHIP         | ELTE-145-C  |
| MOWA         | ELTE-88-B   | SERH         | ELTE-130-C  | WHIP         | ELTE-145-   |
| MPIN         | ELTE-103-   | SFOX         | ELTE-52-A   | WHWT         | ELTE-144-C  |
| MPIN         | ELTE-103-C  | SFOX         | ELTE-52-B   | WHWT         | ELTE-144-   |
| MPOO         | ELTE-139-C  | SFOX         | ELTE-52-B2  | WHWT         | ELTE-144-   |
| MSNZ         | ELTE-116-C  | SHAR         | ELTE-118-C  | WHWT         | ELTE-144-   |
| MUDI         | ELTE-89-A   | SHAR         | ELTE-118-   | WHWT         | ELTE-144-   |
| MUDI         | ELTE-89-B   | SHAR         | ELTE-118-   | WHWT         | ELTE-144-   |
| NEAP         | ELTE-90-B   | SHIH         | ELTE-120-   | WHWT         | ELTE-144-   |
| NEAP         | ELTE-90-B2  | SHIH         | ELTE-120-C  | WHWT         | ELTE-144-   |
| NEAP         | ELTE-90-A   | SMUN         | ELTE-156-   | WSSD         | ELTE-66-A   |
| NEWF         | ELTE-136-C  | SPOO         | ELTE-137-   | WSSD         | ELTE-66-C   |
| NEWF         | ELTE-136-   | SPOO         | ELTE-137-B  | YORK         | ELTE-146-C  |
| OES          | ELTE-23-B   | SSHP         | ELTE-119-B  | YORK         | ELTE-146-   |
| OES          | ELTE-23-B2  | SSHP         | ELTE-119-   | YORK         | ELTE-146-   |
| OES          | ELTE-23-A   | SSNZ         | ELTE-115-   | YUSD         | ELTE-129-   |
| PAPI         | ELTE-99-A   | STAF         | ELTE-127-B  | YUSD         | ELTE-129-C  |
| PEKE         | ELTE-100-   | STAF         | ELTE-127-   |              |             |

**Table S2.** Breed-specific phenotypic values of dogs used in the within-species analyses of relative brain size. Lines are sorted alphabetically by abbreviation name.

| Breed name                               | Abbreviation | Body mass (g) | Brain volume (cm <sup>3</sup> ) | Genetic distance from the wolf | AKC          | Head            | Age of death (years) | Litter size (#pups) |
|------------------------------------------|--------------|---------------|---------------------------------|--------------------------------|--------------|-----------------|----------------------|---------------------|
| American Cocker Spaniel                  | ACKR         | 14288         | 75.227                          | 0.363                          | Sporting     | mesocephalic    | 11.42                | 4.97                |
| Affenpinscher                            | AFFP         | 4500          | 54.186                          |                                | Toy          | brachycephalic  | 12.21                |                     |
| Afghan Hound                             | AFGH         | 22800         | 97.237                          | 0.338                          | Hound        | dolichocephalic | 11.92                |                     |
| Airedale Terrier                         | AIRT         | 22900         | 82.869                          | 0.369                          | Terrier      | dolichocephalic | 10.75                | 7.65                |
| Akita Inu                                | AKIT         | 44800         | 106.794                         | 0.321                          | Working      | mesocephalic    | 10.46                |                     |
| Alaskan Malamute                         | AMAL         | 36900         | 113.936                         | 0.331                          | Working      | mesocephalic    | 10.71                | 6.50                |
| American Bulldog                         | AMB          | 39950         | 124.305                         |                                |              | brachycephalic  |                      |                     |
| American Pit Bull Terrier                | APBT         | 24933         | 91.019                          |                                |              | mesocephalic    | 11.00                |                     |
| Australian Shepherd                      | AUSS         | 21500         | 81.892                          | 0.355                          | Herding      | mesocephalic    | 11.00                | 7.00                |
| Australian Terrier                       | AUST         | 6500          | 59.613                          | 0.357                          | Terrier      | mesocephalic    | 13.54                | 5.25                |
| Bandog                                   | BAND         | 51000         | 117.538                         |                                |              | brachycephalic  |                      |                     |
| Basset Hound                             | BASS         | 26583         | 101.278                         | 0.361                          | Hound        | dolichocephalic | 10.80                | 5.92                |
| Beagle                                   | BEAG         | 14614         | 78.631                          | 0.358                          | Hound        | brachycephalic  | 11.34                | 5.15                |
| Beauceron (Beauce Sheep Dog)             | BEAU         | 49900         | 119.348                         |                                | Herding      | mesocephalic    |                      |                     |
| Bedlington terrier                       | BEDT         | 9100          | 85.869                          | 0.367                          | Terrier      | dolichocephalic | 13.84                | 5.60                |
| Belgian Shepherd Dog - Groenendael       | BELS         | 25000         | 88.985                          | 0.358                          | Herding      | mesocephalic    | 12.20                | 6.30                |
| Bearded Collie                           | BERD         | 24050         | 97.796                          | 0.359                          | Herding      | dolichocephalic | 12.98                |                     |
| Bichon Frisé                             | BICH         | 7011          | 62.060                          | 0.352                          | Non-sporting | brachycephalic  | 12.92                | 5.10                |
| Bernese Mountain Dog (Berner Sennenhund) | BMD          | 45120         | 111.428                         | 0.361                          | Working      | brachycephalic  | 8.00                 | 6.57                |
| Bichon Bolognese                         | BOL          | 3313          | 60.392                          |                                |              | brachycephalic  |                      |                     |
| Border Collie                            | BORD         | 19239         | 89.129                          | 0.353                          | Herding      | mesocephalic    | 12.63                | 6.00                |

| Breed name                                                           | Abbreviation | Body mass (g) | Brain volume (cm <sup>3</sup> ) | Genetic distance from the wolf | AKC          | Head            | Age of death (years) | Litter size (#pups) |
|----------------------------------------------------------------------|--------------|---------------|---------------------------------|--------------------------------|--------------|-----------------|----------------------|---------------------|
| Border Terrier                                                       | BORT         | 10214         | 77.338                          | 0.363                          | Terrier      | mesocephalic    | 12.94                | 4.65                |
| Borzoi                                                               | BORZ         | 39600         | 97.725                          | 0.355                          | Hound        | dolichocephalic | 10.04                |                     |
| Boston Terrier                                                       | BOST         | 9186          | 77.273                          | 0.364                          | Non-sporting | brachycephalic  | 10.92                | 3.85                |
| Boxer                                                                | BOX          | 30103         | 99.104                          | 0.422                          | Working      | brachycephalic  | 9.50                 | 6.04                |
| French Pointing Dog - Gascogne type (Braque Francais, type Gascogne) | BRFG         | 21000         | 94.812                          |                                |              | dolichocephalic |                      |                     |
| Briard                                                               | BRIA         | 34900         | 93.314                          | 0.360                          | Herding      | mesocephalic    | 11.09                |                     |
| Brittany (French Brittany)                                           | BRIT         | 17000         | 78.880                          | 0.357                          | Sporting     | mesocephalic    | 12.54                | 6.23                |
| Black Russian Terrier                                                | BRTR         | 51100         | 109.896                         | 0.358                          | Working      | dolichocephalic | 6.90                 |                     |
| Griffon Bruxellois                                                   | BRUS         | 5100          | 60.904                          | 0.358                          | Toy          | brachycephalic  | 12.75                | 3.38                |
| Basenji                                                              | BSJI         | 10000         | 54.877                          | 0.331                          | Hound        | mesocephalic    | 12.27                | 5.15                |
| Bucovina Shepherd Dog (Southeastern European Shepherd)               | BUC          | 70000         | 114.678                         |                                |              | mesocephalic    |                      |                     |
| Bulldog                                                              | BULD         | 24867         | 106.282                         | 0.377                          | Non-sporting | brachycephalic  | 6.70                 | 4.99                |
| Bullmastiff                                                          | BULM         | 54180         | 118.466                         | 0.368                          | Working      | brachycephalic  | 8.03                 | 6.70                |
| Bull Terrier                                                         | BULT         | 25600         | 88.247                          | 0.378                          | Terrier      | mesocephalic    | 11.20                | 5.85                |
| Cairn terrier                                                        | CAIR         | 8100          | 73.532                          | 0.355                          | Terrier      | brachycephalic  | 13.41                | 4.30                |
| Cane Corso                                                           | CANE         | 48800         | 111.919                         | 0.360                          | Working      | brachycephalic  |                      |                     |
| Welsh Corgi - Cardigan                                               | CARD         | 14000         | 87.893                          | 0.358                          | Herding      | brachycephalic  | 12.59                |                     |
| Central Asian Shepherd Dog (Ovtcharka)                               | CASD         | 60557         | 115.208                         |                                |              | mesocephalic    |                      |                     |
| Curly Coated Retriever                                               | CCRT         | 36000         | 112.563                         | 0.358                          | Sporting     | mesocephalic    | 11.88                |                     |
| Canadian Eskimo Dog                                                  | CED          | 39000         | 90.946                          |                                |              | mesocephalic    |                      |                     |
| Chihuahua                                                            | CHIH         | 2828          | 55.009                          | 0.348                          | Toy          | brachycephalic  | 12.42                | 3.19                |
| Japanese Chin                                                        | CHIN         | 3900          | 48.384                          | 0.349                          | Toy          | brachycephalic  | 11.13                |                     |
| Chow Chow                                                            | CHOW         | 25667         | 74.523                          | 0.315                          | Non-sporting | brachycephalic  | 9.38                 | 4.15                |
| Czechoslovakian Wolfdog                                              | CHW          | 22200         | 107.894                         |                                |              | dolichocephalic |                      |                     |
| Cavalier King Charles Spaniel                                        | CKCS         | 10411         | 79.774                          | 0.364                          | Toy          | brachycephalic  | 10.30                | 4.30                |

| Breed name                              | Abbreviation | Body mass (g) | Brain volume (cm <sup>3</sup> ) | Genetic distance from the wolf | AKC          | Head            | Age of death (years) | Litter size (#pups) |
|-----------------------------------------|--------------|---------------|---------------------------------|--------------------------------|--------------|-----------------|----------------------|---------------------|
| Canary Mastiff (Perro de Presa Canario) | CMAS         | 56100         | 108.566                         |                                |              | brachycephalic  |                      |                     |
| Collie                                  | COLL         | 28100         | 84.146                          | 0.365                          | Herding      | dolichocephalic | 12.00                | 5.83                |
| Coton de Tulear                         | COTO         | 6100          | 61.340                          | 0.351                          | Non-sporting | brachycephalic  |                      | 4.10                |
| Chinese Crested Dog                     | CRES         | 5300          | 61.757                          | 0.355                          | Toy          | brachycephalic  | 11.04                | 4.30                |
| Caucasian Shepherd Dog                  | CSD          | 53020         | 119.006                         |                                |              | mesocephalic    |                      |                     |
| Dachshund                               | DACH         | 8457          | 66.194                          | 0.354                          | Hound        | dolichocephalic | 12.20                | 4.37                |
| Dalmatian                               | DALM         | 24888         | 86.685                          | 0.357                          | Non-sporting | mesocephalic    | 12.50                | 7.10                |
| Great dane                              | DANE         | 58917         | 118.590                         | 0.360                          | Working      | mesocephalic    | 6.25                 | 6.83                |
| Bordeaux Dog (Dogue de Bordeaux)        | DDBX         | 60700         | 112.441                         | 0.371                          | Working      | brachycephalic  | 5.50                 | 8.10                |
| Scottish Deerhound                      | DEER         | 40200         | 110.069                         | 0.367                          | Hound        | dolichocephalic | 9.09                 |                     |
| Dogo Argentino                          | DGA          | 40800         | 121.076                         |                                |              | mesocephalic    |                      | 8.12                |
| Doberman Pinscher                       | DOBP         | 34622         | 98.862                          | 0.362                          | Working      | dolichocephalic | 9.50                 | 7.34                |
| Norwegian Hound (Dunker)                | DUNK         | 14500         | 93.839                          |                                |              | mesocephalic    |                      | 7.40                |
| English Cocker Spaniel                  | ECKR         | 13604         | 78.315                          | 0.361                          | Sporting     | dolichocephalic | 10.96                | 5.50                |
| English Pointer                         | ENPO         | 28767         | 105.061                         |                                | Sporting     | mesocephalic    | 12.42                | 6.95                |
| English Setter                          | ESET         | 28500         | 97.593                          | 0.356                          | Sporting     | dolichocephalic | 11.20                | 5.97                |
| English Springer Spaniel                | ESSP         | 21355         | 87.985                          | 0.359                          | Sporting     | dolichocephalic | 12.00                | 6.65                |
| French Bulldog                          | FBUL         | 11037         | 85.894                          | 0.369                          | Non-sporting | brachycephalic  | 9.50                 | 4.93                |
| Flat-Coated Retriever                   | FCR          | 35725         | 93.046                          | 0.363                          | Sporting     | dolichocephalic | 9.67                 | 7.56                |
| Fila Brasileiro                         | FIBR         | 69500         | 108.934                         |                                |              | mesocephalic    |                      |                     |
| Grand Anglo-Français Blanc et Noir      | GABN         | 29500         | 117.793                         |                                |              | dolichocephalic |                      |                     |
| Spanish sighthound (Galgo Español)      | GESP         | 26000         | 113.114                         |                                |              | dolichocephalic |                      |                     |
| Giant German Spitz                      | GGs          | 17500         | 100.043                         |                                |              | mesocephalic    |                      |                     |
| Golden Retriever                        | GOLD         | 29342         | 101.457                         | 0.360                          | Sporting     | mesocephalic    | 11.88                | 7.18                |
| Gordon Setter                           | GORD         | 33250         | 101.341                         | 0.356                          | Sporting     | dolichocephalic | 11.30                | 7.55                |
| Great Pyrenees (Pyrenean Mountain Dog)  | GPYR         | 51500         | 125.300                         | 0.357                          | Working      | mesocephalic    | 10.79                |                     |

| Breed name                  | Abbreviation | Body mass (g) | Brain volume (cm <sup>3</sup> ) | Genetic distance from the wolf | AKC          | Head            | Age of death (years) | Litter size (#pups) |
|-----------------------------|--------------|---------------|---------------------------------|--------------------------------|--------------|-----------------|----------------------|---------------------|
| Greenland Dog               | GREE         | 31000         | 64.970                          | 0.329                          |              | mesocephalic    | 8.46                 | 5.60                |
| Greyhound                   | GREY         | 31842         | 103.128                         | 0.363                          | Hound        | dolichocephalic | 10.80                | 5.94                |
| German Shepherd Dog         | GSD          | 33242         | 95.997                          | 0.361                          | Herding      | dolichocephalic | 9.79                 | 6.60                |
| German Short Haired Pointer | GSHP         | 27700         | 88.513                          | 0.353                          | Sporting     | dolichocephalic | 10.50                | 7.95                |
| Greater Swiss Mountain Dog  | GSMD         | 60000         | 103.321                         | 0.365                          | Working      | mesocephalic    | 10.20                | 7.90                |
| Giant Schnauzer             | GSNZ         | 39800         | 103.712                         | 0.358                          | Working      | mesocephalic    | 10.50                | 7.75                |
| German Spaniel              | GSPA         | 21500         | 109.270                         |                                |              | mesocephalic    |                      |                     |
| German Pointer, Wire-haired | GWHP         | 29500         | 97.029                          | 0.353                          | Sporting     | dolichocephalic | 10.00                |                     |
| Hanover hound               | HANO         | 40500         | 85.120                          |                                |              | mesocephalic    |                      |                     |
| Bichon Havanese             | HAVA         | 5060          | 68.610                          | 0.353                          | Toy          | brachycephalic  | 12.38                | 4.92                |
| Hovawart                    | HOV          | 32900         | 104.261                         |                                |              | mesocephalic    | 12.92                |                     |
| Hungarian Greyhound         | HUGR         | 26500         | 103.456                         |                                |              | dolichocephalic |                      |                     |
| Siberian Husky              | HUSK         | 22954         | 90.329                          | 0.326                          | Working      | mesocephalic    | 12.00                | 5.50                |
| Peruvian Hairless Dog       | INCA         | 14500         | 80.692                          | 0.351                          |              | mesocephalic    |                      |                     |
| Irish Setter                | ISET         | 30933         | 96.149                          | 0.360                          | Sporting     | dolichocephalic | 11.44                | 7.52                |
| Italian Greyhound           | ITGY         | 5875          | 67.304                          | 0.358                          | Toy          | mesocephalic    | 14.25                | 3.30                |
| Irish Wolfhound             | IWOF         | 54500         | 120.594                         | 0.364                          | Hound        | dolichocephalic | 6.62                 | 6.01                |
| Jack Russell Terrier        | JACK         | 7721          | 66.011                          | 0.353                          |              | brachycephalic  | 13.50                | 4.14                |
| King Charles Spaniel        | KCS          | 6950          | 86.148                          |                                | Toy          | brachycephalic  | 10.10                | 2.88                |
| Keeshond (Wolfspitz)        | KEES         | 19550         | 77.027                          | 0.354                          | Non-sporting | mesocephalic    | 12.61                |                     |
| Kerry Blue Terrier          | KERY         | 12500         | 75.544                          | 0.364                          | Terrier      | mesocephalic    | 12.25                | 4.85                |
| Komondor                    | KOMO         | 50050         | 109.124                         | 0.350                          | Working      | mesocephalic    | 10.57                | 6.70                |
| Kuvasz                      | KUVZ         | 43800         | 132.534                         | 0.350                          | Working      | mesocephalic    |                      |                     |
| Labrador Retriever          | LAB          | 30392         | 99.677                          | 0.358                          | Sporting     | mesocephalic    | 11.88                | 6.73                |
| Leonberger                  | LEON         | 60700         | 120.018                         | 0.359                          | Working      | mesocephalic    | 8.75                 | 7.54                |
| Lhasa Apso                  | LHSA         | 9100          | 60.401                          | 0.340                          | Non-sporting | brachycephalic  | 13.00                | 4.80                |

| Breed name                                  | Abbreviation | Body mass (g) | Brain volume (cm <sup>3</sup> ) | Genetic distance from the wolf | AKC          | Head            | Age of death (years) | Litter size (#pups) |
|---------------------------------------------|--------------|---------------|---------------------------------|--------------------------------|--------------|-----------------|----------------------|---------------------|
| Large Münsterländer                         | LMUN         | 30000         | 108.282                         | 0.355                          |              | mesocephalic    | 11.33                |                     |
| Landseer                                    | LNDS         | 65000         | 127.000                         |                                |              | mesocephalic    |                      |                     |
| Maltese                                     | MALT         | 4295          | 50.379                          | 0.352                          | Toy          | brachycephalic  | 12.88                | 4.90                |
| English Mastiff                             | MAST         | 80411         | 116.761                         | 0.365                          | Working      | brachycephalic  | 7.10                 | 7.70                |
| Miniature bull terrier                      | MBLT         | 12500         | 72.147                          | 0.374                          | Terrier      | dolichocephalic | 9.29                 |                     |
| Medium German Spitz                         | MDGS         | 12500         | 70.555                          |                                |              | mesocephalic    |                      |                     |
| Medium Poodle                               | MDPO         | 11000         | 68.077                          |                                | Non-sporting | dolichocephalic | 15.00                | 4.25                |
| Miniature German Spitz                      | MNGS         | 8500          | 61.276                          |                                |              | brachycephalic  | 11.33                |                     |
| Moscow Watchdog                             | MOWA         | 56700         | 118.315                         |                                |              | mesocephalic    |                      |                     |
| Miniature Pinscher                          | MPIN         | 4133          | 52.991                          | 0.360                          | Toy          | dolichocephalic | 14.00                | 3.85                |
| Miniature Poodle                            | MPOO         | 6880          | 67.019                          | 0.358                          | Non-sporting | dolichocephalic | 14.20                | 3.65                |
| Miniature Schnauzer                         | MSNZ         | 8694          | 63.517                          | 0.364                          | Terrier      | mesocephalic    | 10.98                | 4.32                |
| Mudi                                        | MUDI         | 13333         | 73.922                          |                                |              | brachycephalic  |                      |                     |
| Neapolitan Mastiff (Mastino Napoletano)     | NEAP         | 60000         | 109.930                         | 0.360                          | Working      | brachycephalic  | 2.33                 |                     |
| Newfoundland                                | NEWF         | 54450         | 98.187                          | 0.359                          | Working      | brachycephalic  | 9.54                 | 6.48                |
| Nova Scotia Duck-Tolling Retriever (Toller) | NSDT         | 14500         | 80.822                          | 0.358                          | Sporting     | mesocephalic    | 10.50                | 6.60                |
| Old English Sheepdog (Bobtail)              | OES          | 33800         | 91.590                          | 0.360                          | Herding      | mesocephalic    | 10.75                | 7.65                |
| Papillon (Continental Toy Spaniel)          | PAPI         | 3900          | 62.039                          | 0.354                          | Toy          | brachycephalic  | 13.29                | 3.62                |
| Pekingese                                   | PEKE         | 4617          | 55.210                          | 0.348                          | Toy          | brachycephalic  | 11.42                | 3.00                |
| Welsh Corgi                                 | PEMB         | 13033         | 80.085                          | 0.360                          | Herding      | mesocephalic    | 12.11                | 5.13                |
| Polish Hound                                | POLH         | 26000         | 100.888                         |                                |              | mesocephalic    |                      | 7.20                |
| Pomeranian                                  | POM          | 3225          | 55.702                          | 0.351                          | Toy          | brachycephalic  | 12.34                | 2.63                |
| Portuguese Sheepdog (Cão da Serra de Aires) | POSH         | 22000         | 74.815                          |                                |              | mesocephalic    |                      |                     |
| Pug                                         | PUG          | 8518          | 77.954                          | 0.363                          | Toy          | brachycephalic  | 12.00                | 4.20                |
| Puli                                        | PULI         | 12388         | 85.730                          | 0.353                          | Herding      | mesocephalic    | 12.42                |                     |
| Pumi                                        | PUMI         | 11600         | 75.785                          | 0.349                          | Herding      | mesocephalic    |                      |                     |

| Breed name                       | Abbreviation | Body mass (g) | Brain volume (cm <sup>3</sup> ) | Genetic distance from the wolf | AKC          | Head            | Age of death (years) | Litter size (#pups) |
|----------------------------------|--------------|---------------|---------------------------------|--------------------------------|--------------|-----------------|----------------------|---------------------|
| Pyrenean Mastiff                 | PYRM         | 89600         | 122.620                         |                                |              | mesocephalic    |                      |                     |
| Rhodesian Ridgeback              | RHOD         | 35160         | 112.936                         | 0.357                          | Hound        | dolichocephalic | 10.05                | 9.20                |
| Rottweiler                       | ROTT         | 46920         | 102.305                         | 0.361                          | Working      | brachycephalic  | 8.92                 | 8.50                |
| Saluki                           | SALU         | 22500         | 87.653                          | 0.335                          | Hound        | dolichocephalic | 12.25                |                     |
| Samoyed                          | SAMO         | 22250         | 90.386                          | 0.342                          | Working      | brachycephalic  | 11.00                | 6.10                |
| Schapendoes (Dutch Sheepdog)     | SCHA         | 15900         | 80.019                          |                                |              | mesocephalic    |                      | 6.11                |
| Scottish Terrier                 | SCOT         | 9400          | 70.980                          | 0.361                          | Terrier      | dolichocephalic | 11.13                | 4.90                |
| Wheaten Terrier                  | SCWT         | 19550         | 72.932                          | 0.364                          | Terrier      | dolichocephalic | 13.00                | 5.80                |
| Serbian Hound                    | SERH         | 17000         | 91.944                          |                                |              | mesocephalic    |                      |                     |
| Fox Terrier, Smooth              | SFOX         | 6400          | 67.505                          |                                | Terrier      | dolichocephalic |                      | 4.10                |
| Shar Pei                         | SHAR         | 16900         | 83.959                          | 0.321                          | Non-sporting | brachycephalic  | 7.65                 | 5.00                |
| Shih Tzu                         | SHIH         | 7017          | 61.770                          | 0.347                          | Toy          | brachycephalic  | 13.24                | 4.24                |
| Silky Terrier                    | SILK         | 4400          | 46.832                          | 0.354                          | Toy          | mesocephalic    | 13.38                |                     |
| Small Münsterländer              | SMUN         | 17100         | 89.527                          |                                |              | mesocephalic    | 11.00                | 6.90                |
| Poodle Medium                    | SPOO         | 18987         | 96.824                          | 0.367                          | Non-sporting | dolichocephalic | 12.00                | 6.70                |
| Shetland Sheepdog                | SSHP         | 9933          | 55.602                          | 0.361                          | Herding      | dolichocephalic | 12.50                | 3.74                |
| Standard Schnauzer               | SSNZ         | 12467         | 67.836                          | 0.356                          | Working      | mesocephalic    | 12.48                | 5.10                |
| Staffordshire Bull Terrier       | STAF         | 16727         | 95.225                          | 0.368                          | Terrier      | brachycephalic  | 10.77                | 5.60                |
| St. Bernard                      | STBD         | 64214         | 125.693                         | 0.359                          | Working      | mesocephalic    | 7.00                 | 7.48                |
| Tibetan Mastiff                  | TIBM         | 53500         | 108.451                         | 0.317                          | Working      | mesocephalic    | 11.92                |                     |
| Tibetan Terrier                  | TIBT         | 10900         | 84.943                          | 0.347                          | Non-sporting | mesocephalic    | 13.24                | 5.40                |
| Tosa                             | TOSA         | 63500         | 113.780                         |                                |              | brachycephalic  |                      |                     |
| Toy Poodle                       | TPOO         | 3600          | 62.697                          | 0.355                          | Toy          | dolichocephalic | 14.63                | 2.40                |
| Transylvanian Hound              | TRHO         | 28500         | 100.307                         |                                |              | mesocephalic    |                      |                     |
| Belgian Shepherd Dog - Tervueren | TURV         | 25000         | 102.008                         | 0.357                          | Herding      | dolichocephalic | 13.00                | 6.12                |
| Toy Fox Terrier                  | TYFX         | 3400          | 54.336                          | 0.356                          | Toy          | mesocephalic    | 14.00                |                     |

| Breed name                                                                            | Abbreviation | Body mass (g) | Brain volume (cm <sup>3</sup> ) | Genetic distance from the wolf | AKC      | Head            | Age of death (years) | Litter size (#pups) |
|---------------------------------------------------------------------------------------|--------------|---------------|---------------------------------|--------------------------------|----------|-----------------|----------------------|---------------------|
| Vizsla                                                                                | VIZS         | 25429         | 99.571                          | 0.356                          | Sporting | dolichocephalic | 12.50                |                     |
| Weimaraner                                                                            | WEIM         | 34173         | 103.001                         | 0.360                          | Sporting | dolichocephalic | 10.33                |                     |
| Welsh Terrier                                                                         | WELT         | 8800          | 64.621                          |                                | Terrier  | dolichocephalic | 11.84                | 4.00                |
| Fox Terrier, Wire                                                                     | WFOX         | 7100          | 63.576                          | 0.365                          | Terrier  | dolichocephalic | 13.00                | 3.90                |
| Whippet                                                                               | WHIP         | 11970         | 83.523                          | 0.363                          | Hound    | dolichocephalic | 12.79                | 5.25                |
| West Highland White Terrier                                                           | WHWT         | 8475          | 71.490                          | 0.362                          | Terrier  | brachycephalic  | 12.87                | 3.72                |
| White Swiss Shepherd Dog (Berger Blanc Suisse, White German Shepherd, White Shepherd) | WSSD         | 32400         | 104.929                         |                                |          | mesocephalic    |                      | 6.50                |
| Yorkshire Terrier                                                                     | YORK         | 3725          | 53.149                          | 0.357                          | Toy      | mesocephalic    | 12.80                | 3.77                |
| Yugoslavian Shepherd Dog (Šarplaninac)                                                | YUSD         | 32400         | 121.075                         |                                |          | mesocephalic    |                      |                     |

**Table S3.** A phylogenetic mixed model testing for the effect of function, head shape, longevity and litter size on brain size in dogs when controlling for body mass and the effects due to common descent and gene flow.

| <b>Response:</b> brain volume ( $\log_{10}$ )     |                         | DIC: -391.003            |
|---------------------------------------------------|-------------------------|--------------------------|
| <b>RANDOM EFFECTS</b>                             |                         | $\sigma^2$ (95 % CrI)    |
| genetic distance (common ancestry, $\sigma_a^2$ ) | 0.063 (0.036 – 0.099)   |                          |
| haplotype sharing (gene flow, $\sigma_b^2$ )      | 0.022 (0.014 – 0.029)   |                          |
| Residual ( $\sigma_e^2$ )                         | 0.001 (0.000 – 0.003)   |                          |
| <b>FIXED EFFECTS</b>                              |                         | $\beta$ (95 % CrI) pMCMC |
| Intercept                                         | 0.718 (-0.674 – 2.543)  | 0.388                    |
| body mass ( $\log_{10}$ )                         | 0.275 (-0.065 – 0.570)  | 0.098                    |
| AKC [hounds]                                      | 0.022 (-0.194 – 0.206)  | 0.810                    |
| AKC [non-sporting dogs]                           | 0.022 (-0.176 – 0.221)  | 0.818                    |
| AKC [sporting dogs]                               | 0.009 (-0.175 – 0.197)  | 0.932                    |
| AKC [terriers]                                    | 0.021 (-0.170 – 0.209)  | 0.844                    |
| AKC [toy dogs]                                    | 0.053 (-0.179 – 0.261)  | 0.602                    |
| AKC [working dogs]                                | 0.008 (-0.175 – 0.182)  | 0.898                    |
| head shape [dolichocephalic]                      | 0.004 (-0.121 – 0.125)  | 0.952                    |
| head shape [mesocephalic]                         | -0.002 (-0.118 – 0.108) | 0.980                    |
| longevity (age at death)                          | -0.001 (-0.036 – 0.034) | 0.988                    |
| litter size (number of pups)                      | 0.002 (-0.054 – 0.061)  | 0.966                    |
